# Supplementary material for: Molecular basis for fungicidal action of neothyonidioside, a triterpene glycoside from the sea cucumber, Australostichopus mollis
Source: Royal Society of Chemistry journal article supplement (doi:10.1039/c2mb05426d), 2012-01-23
Supplement: c2mb05426d.pdf [file c2mb05426d.pdf]

**Supplementary Table 1.**

| Process                 | Component             | Genes                                                                  | P-value  |
|-------------------------|-----------------------|------------------------------------------------------------------------|----------|
| Vacuolar transport      | ESCRT I complex       | STP22, VPS28                                                           | 9.26E-03 |
|                         | ESCRT II complex      | SNF8, VPS36, VPS25                                                     | 6.39E-05 |
|                         | ESCRT III complex     | VPS20, SNF7                                                            | 9.26E-03 |
| Golgi transport         | GARP complex          | VPS52, VPS51                                                           | 9.26E-03 |
| Protein glycosylation   | Endoplasmic reticulum | ALG3, ALG5, ALG6, ALG8, OST3, PMT1, CWH41, VAN1                        | 4.88E-04 |
| Membrane invagination   | Membrane              | OSH3, RVS161, VAM7, GVP36, RVS167, VPS41, LDB17, END3                  | 7.78E-03 |
| Lipid metabolic process |                       | LCB3, BST1, FAT1, ALG3, SCS2, ALG6, VPS4, SUR2, OPI1, ALG8, FEN1, ERG4 | 7.78E-03 |

GO analysis of chemical-genetic homologous deletion profiling by BINGO software showed that most of genes identified as hits are significantly enriched in ESCRT complex and proteins involove in vesicle trafficking.

### Supplementary Figure 1

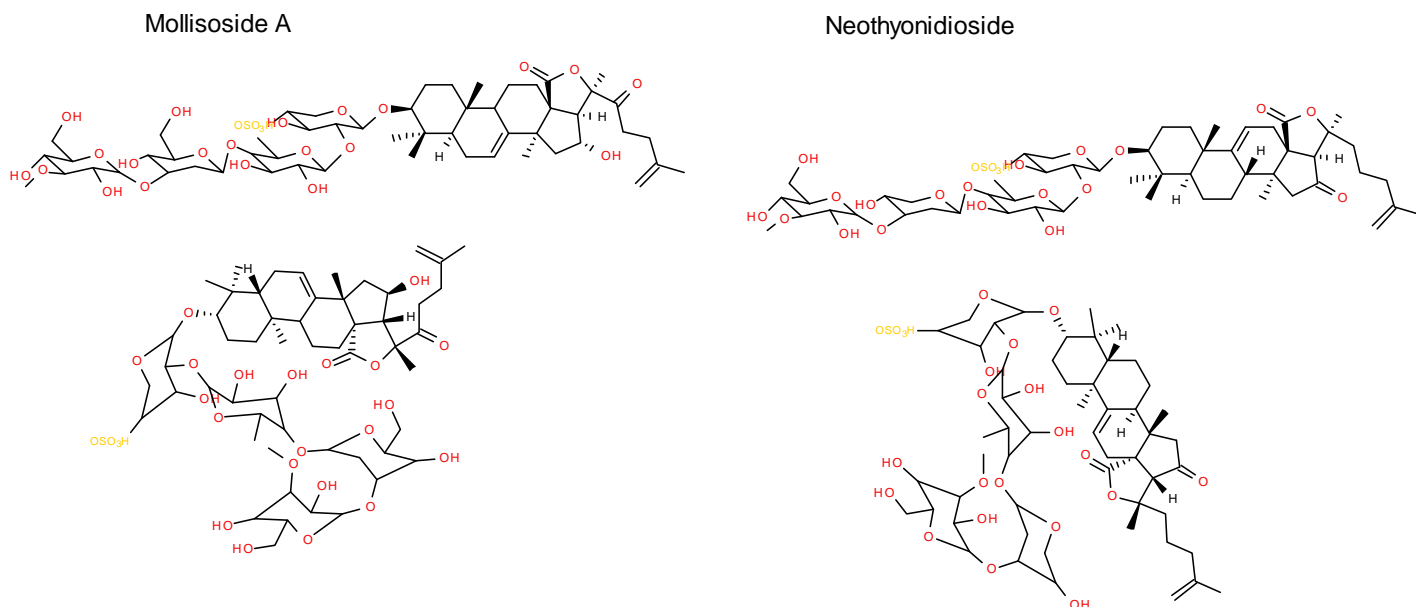

Figure S1. Structure of neothionidioside and molliside A

### Supplementary Figure 2

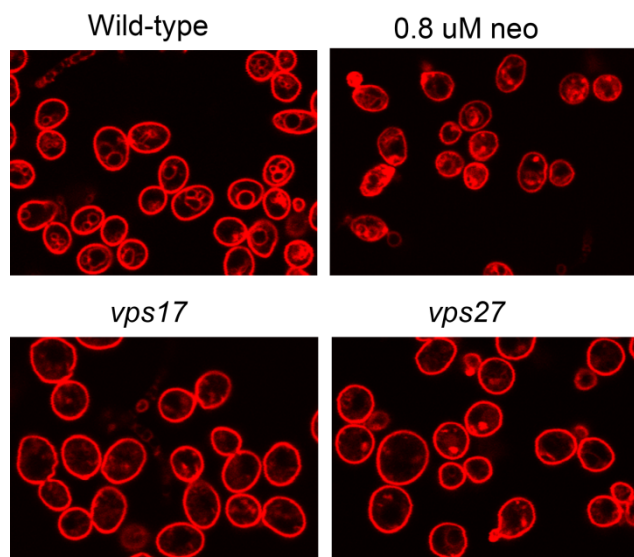

Figure S2. Vacuole morphology of wild-type cells, cells treated with neothionidioside and vacuolar protein sorting (*vps*) mutants staining with FM-4-64 FX as mentioned in experimental section. Cells treated with sublethal concentration of neothionidioside showed defect in vacuole formation similar to  $\Delta vps17$  and  $\Delta vps27$ . Both of these genes were identified as hits in chemical-genetic homologous deletion profiling (HOP) assay. Vps17p is a subunit of the membrane-associated retromer complex. It

assembles with Vps5p to promote vesicle formation and is essential for endosome-to-Golgi retrograde transport. Vsp27p is an endosomal protein and a member of ESCRT-0 complex which is required for recycling Golgi proteins.
